# Supplementary material for: Type II RAF inhibitor causes superior ERK pathway suppression compared to type I RAF inhibitor in cells expressing different BRAF mutant types recurrently found in lung cancer
Source: PubMed Central journal article supplement (PMC5882321; doi:10.18632/oncotarget.24576), 2018-02-27
Supplement: oncotarget-09-16110-s001.pdf [file oncotarget-09-16110-s001.pdf]

## Type II RAF inhibitor causes superior ERK pathway suppression compared to type I RAF inhibitor in cells expressing different BRAF mutant types recurrently found in lung cancer

### SUPPLEMENTARY MATERIALS

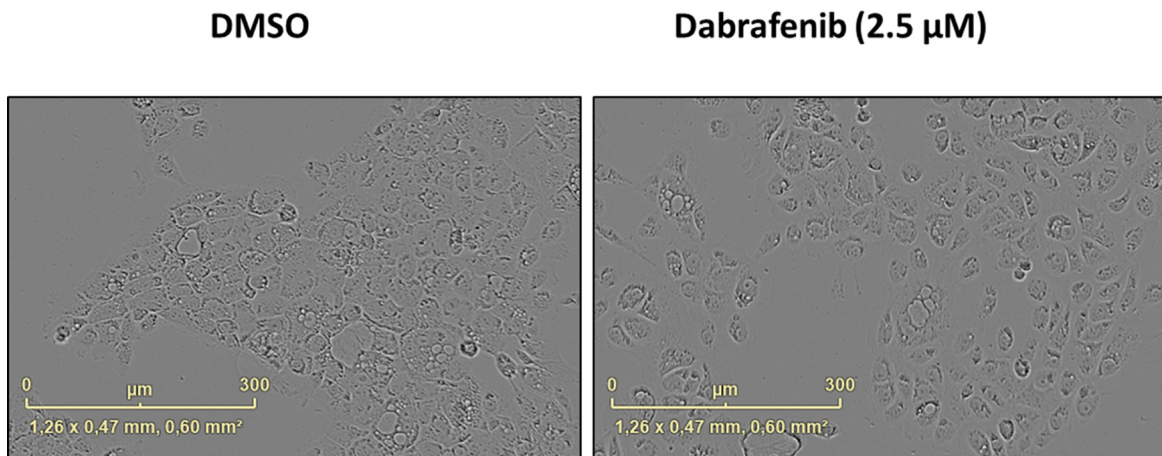

**Supplementary Figure 1: High magnification images of H1666 cells treated with DMSO or Dabrafenib.** High magnification images of Figure 6C reveal that H1666 cells treated with Dabrafenib for one week are less densely distributed compared to the DMSO group.
